# Supplementary material for: A New Approach to Accuracy Evaluation of Single-Tooth Abutment Using Two-Dimensional Analysis in Two Intraoral Scanners
Source: MDPI journal article supplement (doi:10.3390/ijerph16061021), 2019-03-20
Supplement: s1 [file s1]

## Supplemental data

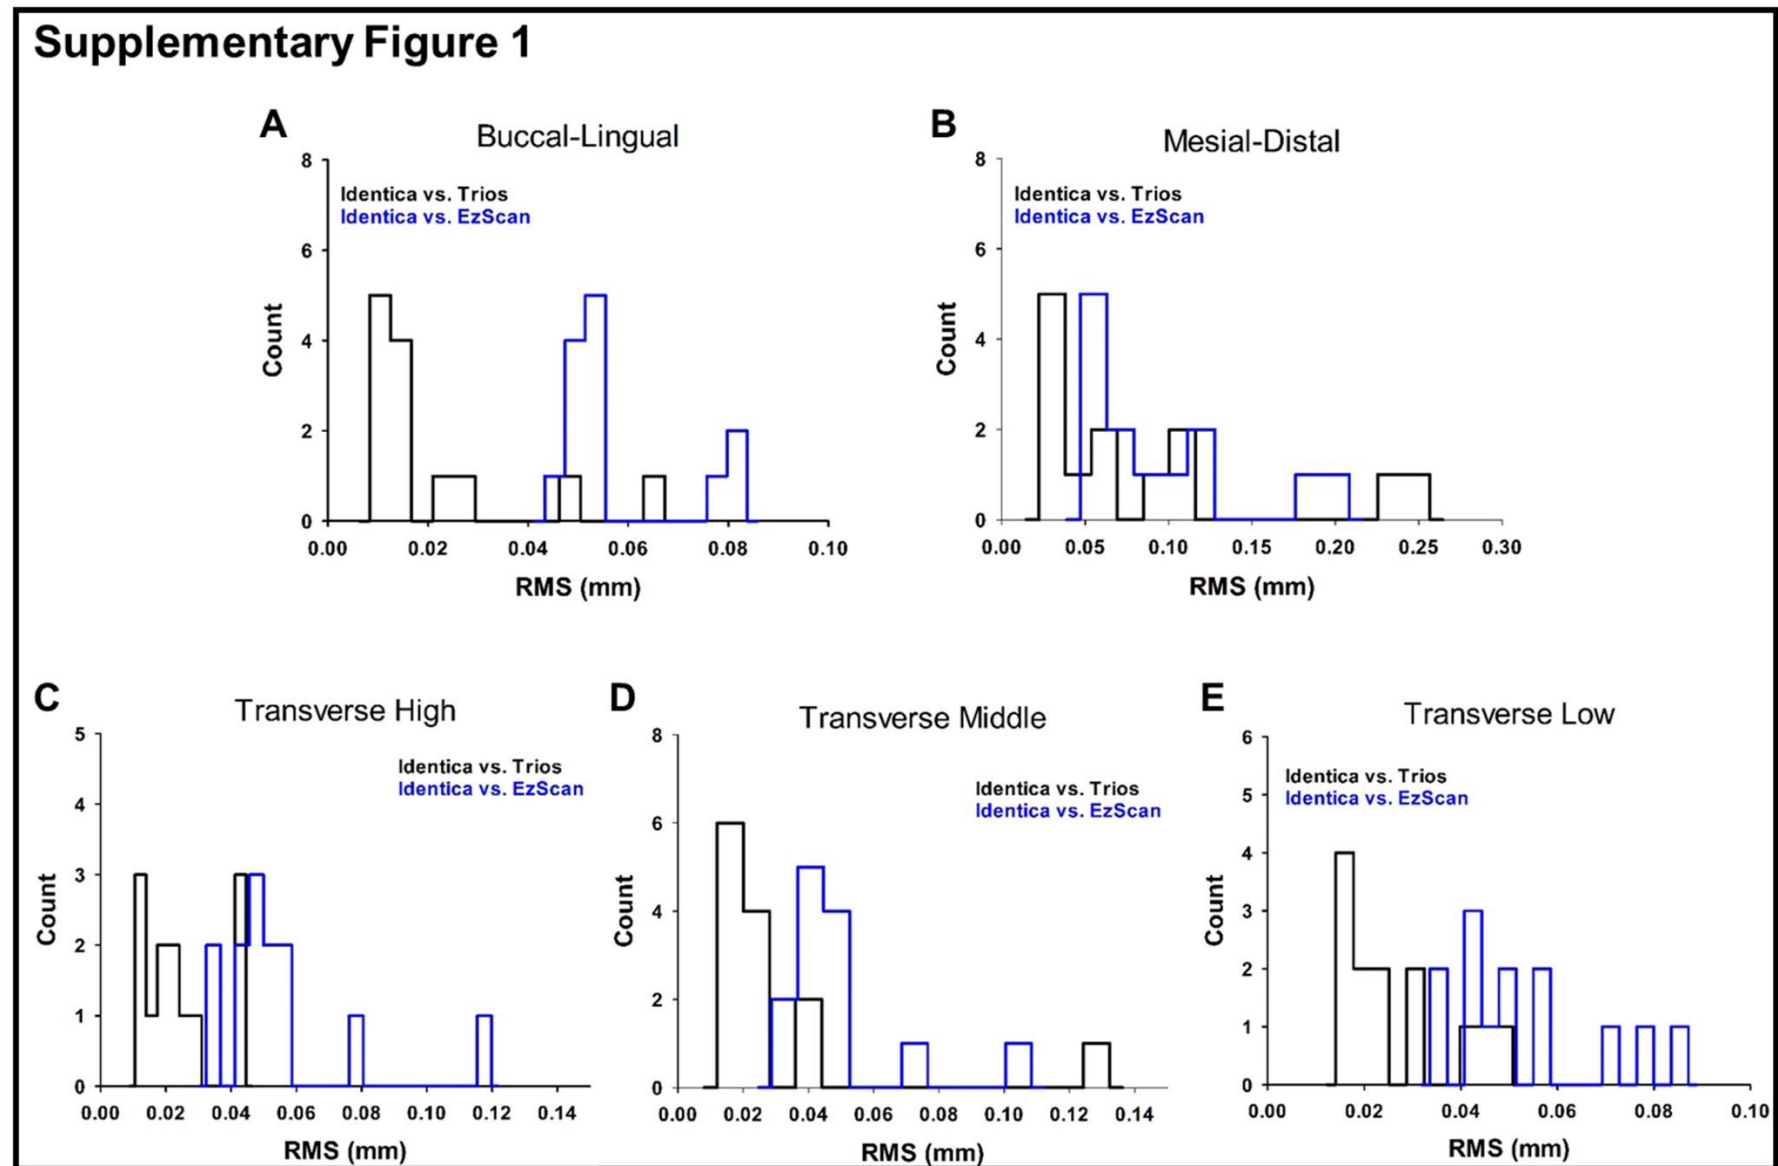

**Figure S1.** Histogram analysis of 2-dimensional analysis for two intraoral scanners (Trios 3®, EzScan®) vs. Identica® at 5 cross sections (BL, MD, TH, TM, TL) expressed with RMS.

## Supplementary Figure 2

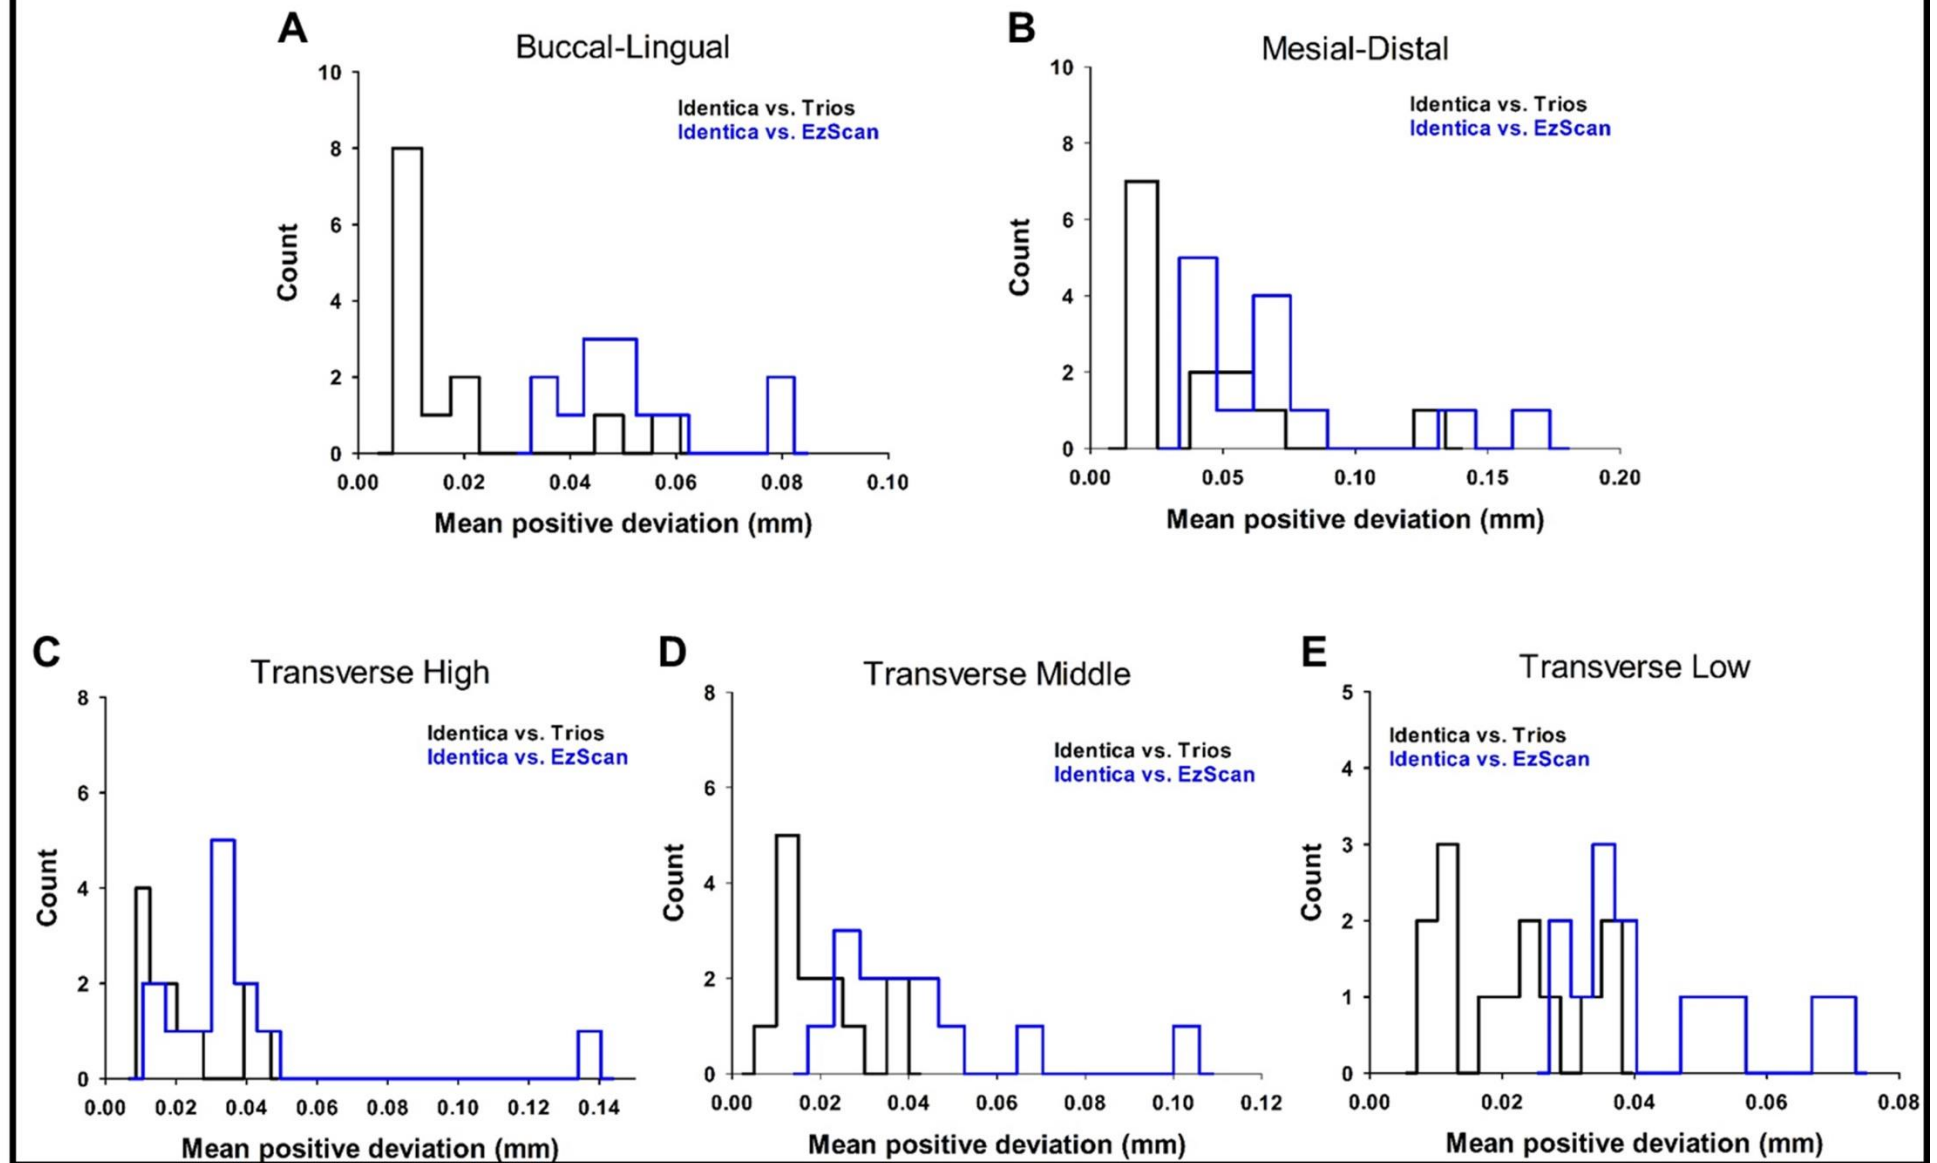

**Figure S2.** Histogram analysis of 2-dimensional analysis for two intraoral scanners (Trios 3®, EzScan®) vs. Identica® at 5 cross sections (BL, MD, TH, TM, TL) expressed with mean positive deviation.

## Supplementary Figure 3

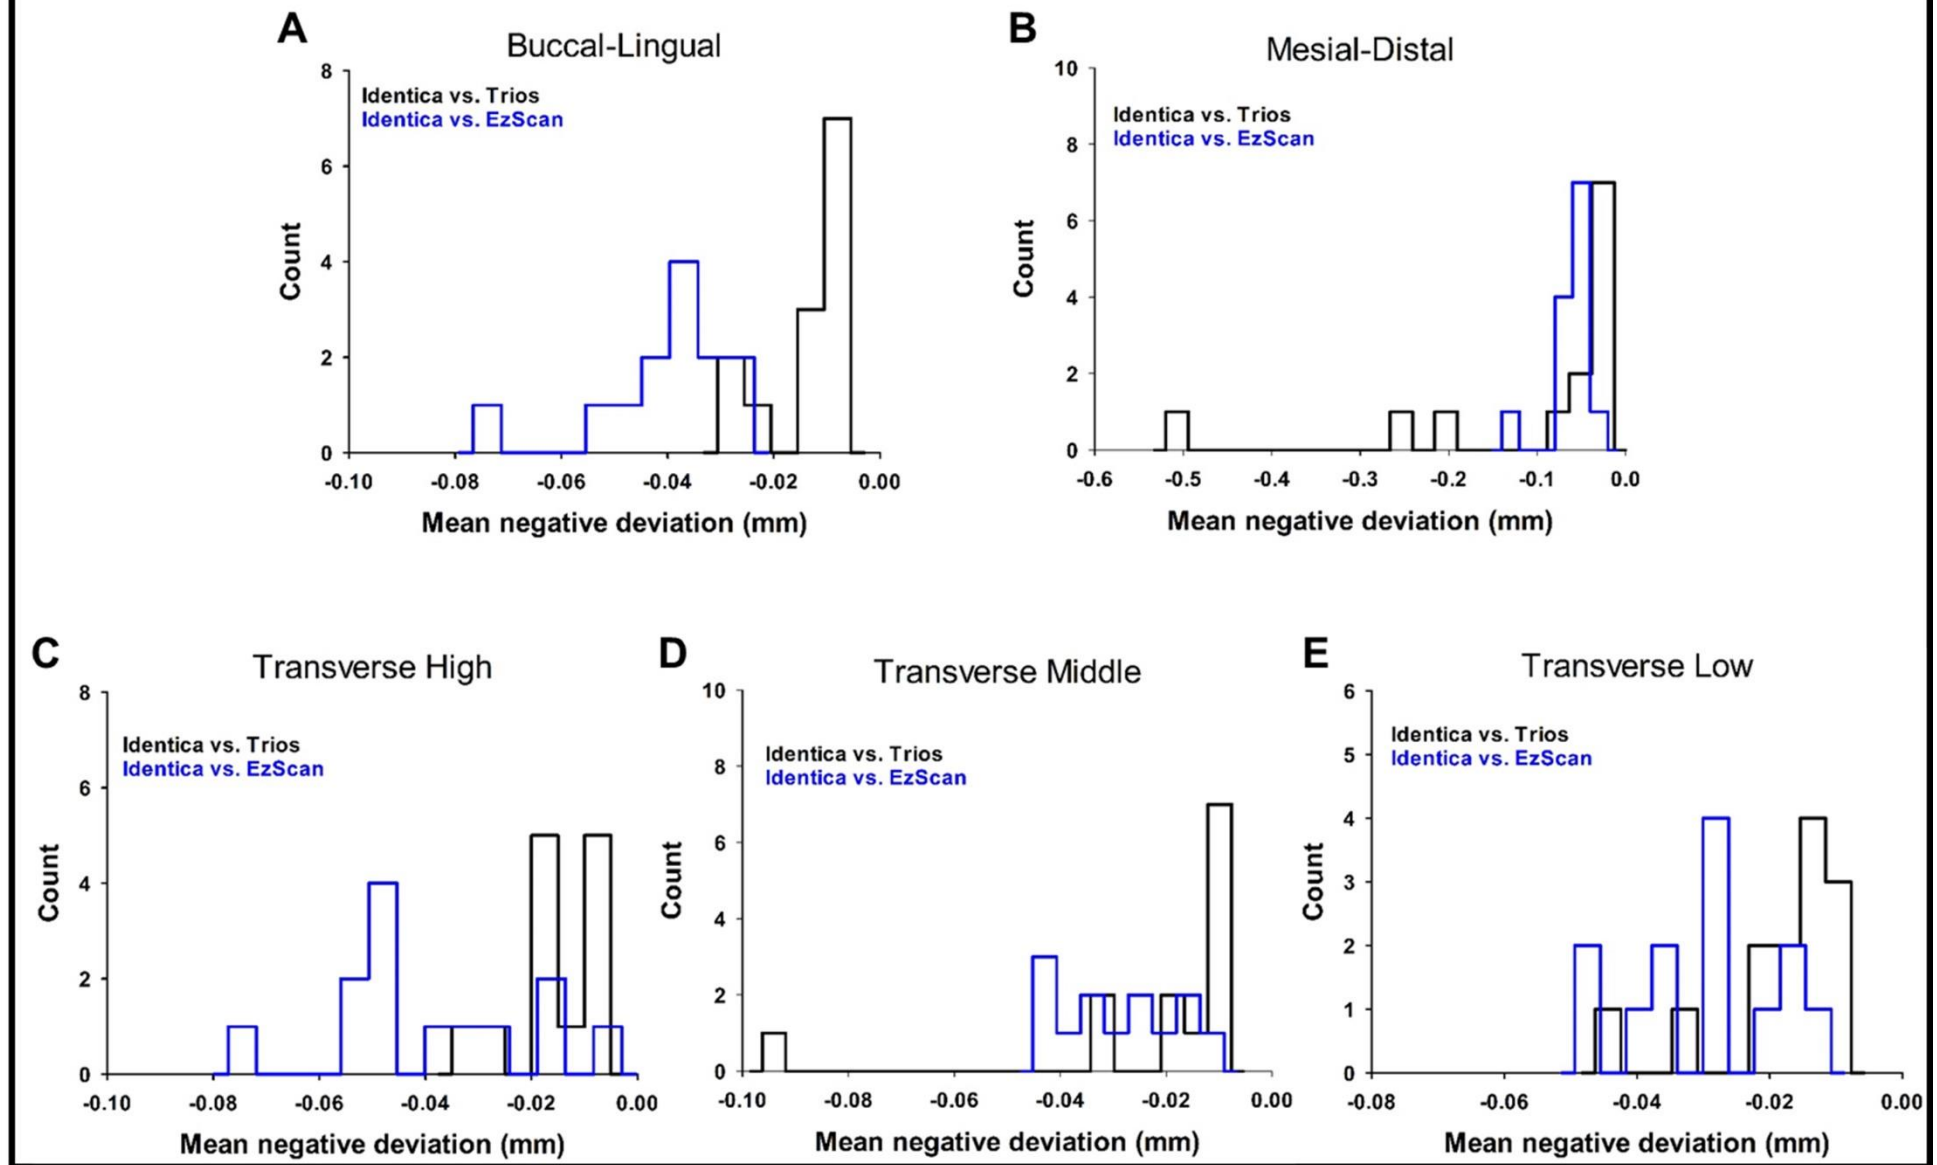

**Figure S3.** Histogram analysis of 2-dimensional analysis for two intraoral scanners (Trios 3®, EzScan®) vs. Identica® at 5 cross sections (BL, MD, TH, TM, TL) expressed with mean negative deviation.
